# Supplementary material for: Expression dynamics of miRNAs and their targets in seed germination conditions reveals miRNA-ta-siRNA crosstalk as regulator of seed germination
Source: PubMed Central journal article supplement (PMC5775422; doi:10.1038/s41598-017-18823-8), 2018-01-19
Supplement: 41598_2017_18823_MOESM1_ESM.pdf [file 41598_2017_18823_MOESM1_ESM.pdf]

Title of the article:

**Expression dynamics of miRNAs and their targets in seed germination conditions reveals miRNA-ta-siRNA crosstalk as regulator of seed germination**

**Full name of Authors:**

Shabari Sarkar Das<sup>1</sup>, Sandeep Yadav<sup>2</sup>, Archita Singh<sup>2</sup>, Vibhav Gautam<sup>2</sup>, Ananda K Sarkar<sup>2</sup>, Asis K Nandi<sup>3</sup>, Prakash Karmakar<sup>3</sup>, Manoj Majee<sup>2</sup>, and Neeti Sanan-Mishra<sup>1</sup>

**Affiliation:**

<sup>1</sup>International Centre for Genetic Engineering and Biotechnology,  
Plant RNAi group,  
Aruna Asaf Ali Marg,  
New Delhi-110067, India

<sup>2</sup>National Institute of Plant Genome Research,  
Aruna Asaf Ali marg,  
New Delhi- 110067, India

<sup>3</sup>Department of Botany and Forestry,  
Vidyasagar University, Midnapore,  
West Bengal, India

**Email addresses:**

Shabari Sarkar Das ([shabaridas@yahoo.co.in](mailto:shabaridas@yahoo.co.in)), Sandeep Yadav([sandeep\\_yadav@nipgr.ac.in](mailto:sandeep_yadav@nipgr.ac.in)), Archita Singh ([archita@nipgr.ac.in](mailto:archita@nipgr.ac.in)), Vibhav Gautam ([vibhav@nipgr.ac.in](mailto:vibhav@nipgr.ac.in)), Ananda K Sarkar ([aksarkar@nipgr.ac.in](mailto:aksarkar@nipgr.ac.in)), Asis K Nandi ([aknind@mail.vidyasagar.ac.in](mailto:aknind@mail.vidyasagar.ac.in)), Prakash Karmakar ([prakash@mail.vidyasagar.ac.in](mailto:prakash@mail.vidyasagar.ac.in)), Manoj Majee ([manojmajee@nipgr.ac.in](mailto:manojmajee@nipgr.ac.in)), Neeti Sanan Mishra ([neeti@icgeb.res.in](mailto:neeti@icgeb.res.in)).

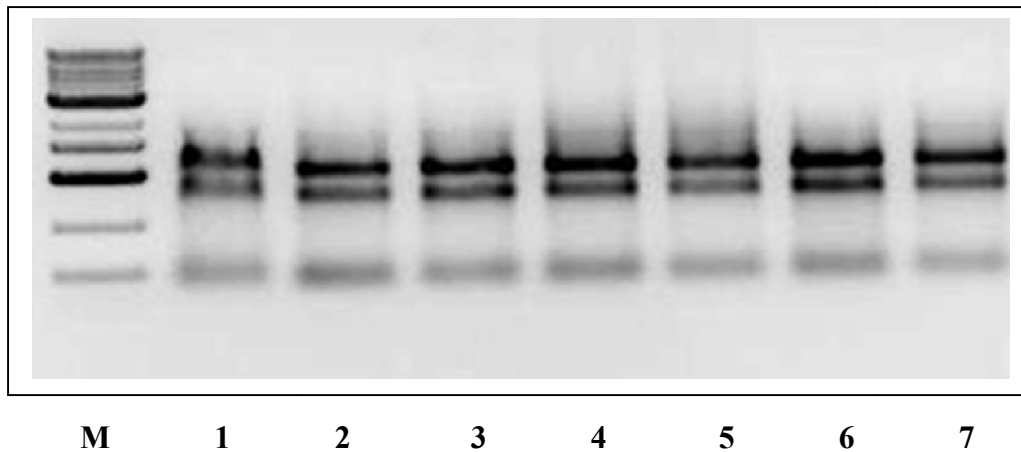

**Fig. S1a. Total RNAs from *Arabidopsis* seeds in 1.2% TAE agarose gel.**

(1: DS, 2: 12h/RT, 3: 12h/4°C, 4: 24h/RT, 5: 24h/4°C, 6: 48h/RT, 7: 48h/4°C , (M): marker. Since this is a gel for RNA quality check, no marker is required.)

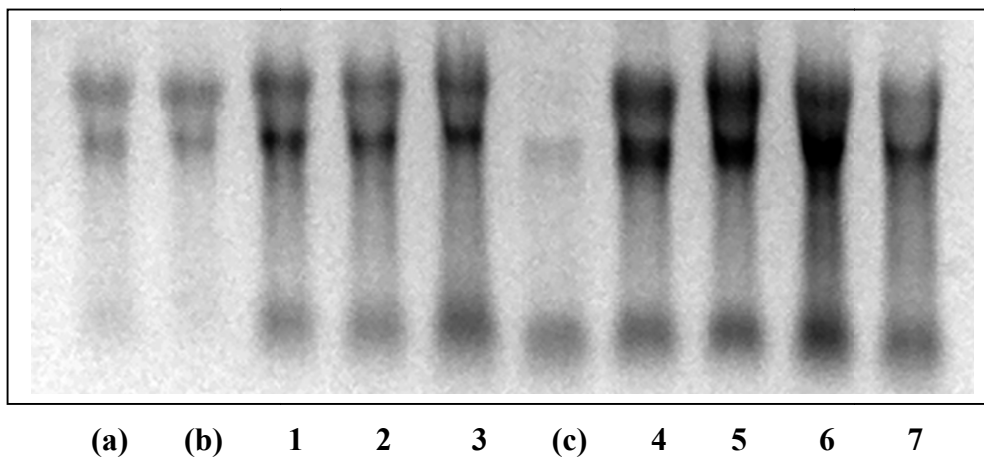

**Fig. S1b. Total RNAs from *Arabidopsis* seeds in MOPS-formaldehyde gel.**

((a) and (b): Positive control RNAs from leaf and shoot tissues, (c): Empty lane having some RNA diffused into it from neighbouring well/s. 1: DS, 2: 12h/RT, 3: 12h/4°C, 4: 24h/RT, 5: 24h/4°C, 6: 48h/RT, 7: 48h/4°C . Since this is a gel for RNA quality check, no marker is required.)

**Supplementary Table S1. List of primers for stem loop qRT-PCR used in this study.**

| Serial no. | Name of the Primers  | Sequence of the primers                                              |
|------------|----------------------|----------------------------------------------------------------------|
| 1          | ath-miR165/166-F     | GTACTCGGACCAGGCTTCA                                                  |
| 2          | ath-miR165/166-SL    | GTC GTA TCC AGT GCA GGG TCC GAG GTA TTC GCA CTG GAT<br>ACG AC GGGGGA |
| 3          | ath-miR172(a/b)F     | CGGCGAGAATCTTGATGATG                                                 |
| 4          | ath-miR172(a/b)-SL   | GTC GTA TCC AGT GCA GGG TCC GAG GTA TTC GCA CTG GAT<br>ACG AC ATGCAG |
| 5          | ath-miR390b-F        | GCGTAAGCTCAGGAGGGAT                                                  |
| 6          | ath-miR390b-SL       | GTC GTA TCC AGT GCA GGG TCC GAG GTA TTC GCA CTG GAT<br>ACG ACGGCGCT  |
| 7          | ath-miR160a          | ACTGCCTGGCTCCCTGT                                                    |
| 8          | 160a-SL              | GTCGTATCCAGTGCAGGGTCCGAGGTATTCGCACTGGATACGACT<br>GGCA                |
| 9          | ath-miR156h-F        | GCGTGGTGACAGAAGAAAGA                                                 |
| 10         | ath-miR156h-SL       | GTC GTA TCC AGT GCA GGG TCC GAG GTA TTC GCA CTG GAT<br>ACG AC GTGCTC |
| 11         | ath-miR157(a/c/d)-F  | GCGTCGTTGACAGAAGATAGA                                                |
| 12         | ath-miR157(a/c/d)-SL | GTC GTA TCC AGT GCA GGG TCC GAG GTA TTC GCA CTG GAT<br>ACG AC GTGCTC |
| 13         | ath-miR164a          | GCTAATGGAGAAGCAGGGCA                                                 |
| 14         | 164a-SL              | GTCGTATCCAGTGCAGGGTCCGAGGTATTCGCACTGGATACGACT<br>GCAC                |
| 15         | ath-miR169b          | GCGTACAGCCAAGGATGACT                                                 |
| 16         | 169b-SL              | GTCGTATCCAGTGCAGGGTCCGAGGTATTCGCACTGGATACGACC<br>CGGC                |
| 17         | ath-miR161-F         | GCTCGCTGAAAGTGACTACAT                                                |
| 18         | ath-miR161-SL        | GTC GTA TCC AGT GCA GGG TCC GAG GTA TTC GCA CTG GAT<br>ACG AC ACCCCG |
| 19         | ath-miR399a-F        | GCGATGCCAAAGGAGATTT                                                  |
| 20         | ath-miR399a-SL       | GTC GTA TCC AGT GCA GGG TCC GAG GTA TTC GCA CTG GAT<br>ACG AC CAGGGC |
| 21         | ath-miR399(b/c)F     | ACGC TGCCAAAGGAGAGTT                                                 |
| 22         | ath-miR824-F         | CTGCGCTAGACCATTTGTGAG                                                |
| 23         | ath-miR824-SL        | GTC GTA TCC AGT GCA GGG TCC GAG GTA TTC GCA CTG GAT<br>ACG AC TCCCTT |
| 24         | ath-miR834-F         | GTCGTGGTAGCAGTAGCGG                                                  |
| 25         | ath-miR834-SL        | GTC GTA TCC AGT GCA GGG TCC GAG GTA TTC GCA CTG GAT<br>ACG AC TTACCA |
| 26         | ath-miR854(a/b)-F    | GCGTCAGATGAGGATAGGGAG                                                |

|    |                                 |                                                                      |
|----|---------------------------------|----------------------------------------------------------------------|
| 27 | ath-miR854-SL                   | GTC GTA TCC AGT GCA GGG TCC GAG GTA TTC GCA CTG GAT<br>ACG AC CTCCTC |
| 28 | ath-miR2112-5p-F                | GCTTAGCGCAAATGCGGA                                                   |
| 29 | ath-miR2112-5p-SL               | GTC GTA TCC AGT GCA GGG TCC GAG GTA TTC GCA CTG GAT<br>ACG ACACATTG  |
| 30 | Universal reverse primer (UVRP) | GTG CAG GGT CCG AGG T                                                |
| 31 | ath-Actin7-F                    | GGT CGT ACA ACC GGT ATT GT                                           |
| 32 | ath-Actin7-R                    | GAT AGC ATG TGG AAG TGA GAA                                          |

**Supplementary Table S2. List of primers for validation of miRNA targets used in this study by qRT-PCR.**

| Serial no. | Name of the Primers | Sequence of the primers    |
|------------|---------------------|----------------------------|
| 1          | PHB-F               | GGACTCCTTTCTATAGCAGAGGAGG  |
| 2          | PHB -R              | AAAGTTTGAAGAAGGTGGCCCAG    |
| 3          | PHV -F              | TTGCGGAGGAGACCTTGGCG       |
| 4          | PHV-R               | GATAGTACCACCATTTCAGTG      |
| 5          | ATHB8-F             | AACACCACTTGACCCCTCAACATCAG |
| 6          | ATHB8-R             | CACGCAACCAACAAGGCTTATCC    |

|    |           |                            |
|----|-----------|----------------------------|
| 7  | ATHB15-F  | ATTGGCATCTCAAAATCCTCAGAGA  |
| 8  | ATHB15-R  | GGCAACACGTTCACTCAACAGC     |
| 9  | ARF10- F  | TGGCGAGTCCATGTGTTATC       |
| 10 | ARF10 - R | TGTA ACTTGTGTTACCGGTGT     |
| 11 | ARF16 -F  | TCAAGCCCGTTAAGCTCTGT       |
| 12 | ARF16 -R  | GGTGGTCTATTCAAGTAGTAATGGTG |
| 13 | ARF17-F   | CCTCAAAGTGGACTGTCTAGTGC    |
| 14 | ARF17 -R  | GGTGAATAGCTGGGGAGGAT       |
| 15 | ARF 2-F   | TCCTGAGGCTAATCAAGACGA      |
| 16 | ARF 2-R   | GGAGGCTGTCGAGACATATC       |
| 17 | ARF 3-F   | CAACACTTGTTCGGATGGTG       |
| 18 | ARF 3-R   | CCCACACCAAATGTTCTCT        |
| 19 | ARF 4-F   | ATACTACCCACCCGAAAC         |
| 20 | ARF 4-R   | TGAGACTGCATCGCAAATC        |
| 21 | SPL3 -F   | GGAAAAGCACA ACTGACTAAAG    |
| 22 | SPL3 -R   | TGTCGTAGGTTTAGCAGATAGC     |
| 23 | SPL9 -F   | CACTAAACTAGAGAGCTACAAGGG   |
| 24 | SPL9 -R   | GAAGAAGCTCGCCATGTAT        |
| 25 | SPL10 -F  | CATATTTGCTGATGGATTGG       |
| 26 | SPL10 -R  | GTGTTTGATCCCTTGTGAATC      |
| 27 | AP2-F     | TCGACGAACCAAGTGTGAC        |
| 28 | AP2-R     | CAGCCAATTTTGATGAGGAGT      |
| 29 | TOE1-F    | AAACAAGCGCCGTGAGAC         |

|    |          |                         |
|----|----------|-------------------------|
| 30 | TOE1-R   | TAACCACGTGTTGCATTGTC    |
| 31 | TOE2-F   | CATGATCAGTCCAGTGGTG     |
| 32 | TOE2-R   | CTGATTCAGATTGACGAAGG    |
| 33 | TOE3-F   | TAGCAATGATGACGACGACT    |
| 34 | TOE3-R   | GATGATGAATCAGGGACGAG    |
| 35 | NAC1-F   | ACTTTGACCAAGAACCCTCTTC  |
| 36 | NAC1-R   | CTGAGTTGGTTAGGTTTCGAGTT |
| 37 | CUC1-F   | GCAATTGCTCCGATCATCAATAC |
| 38 | CUC1-R   | GAGCGGGAAGGAATGTATGAA   |
| 39 | CUC2-F   | ACCAACACAACCGTCACA      |
| 40 | CUC2-R   | AGTTAACGTCTAAGCCCAAGG   |
| 41 | NF-YA8-F | CGGTGGAATCTGGTAATGTGT   |

|    |          |                             |
|----|----------|-----------------------------|
| 42 | NF-YA8-R | CTGGACAAAGCGTGTGAAATAAG     |
| 43 | NF-YA5-F | TCCGGAGACTGGTGATGATA        |
| 44 | NF-YA5-R | GAGATTGTAGAGGATATGAAAGCAAAG |
| 45 | PPR-F    | GCTACTCGAATGGTAAGCTGTAT     |
| 46 | PPR-R    | CCTCTGAAACCCTTCCTTCTTT      |
| 47 | PHO2-F   | AAGTGAAGTTTCTCCCGTTAGG      |
| 48 | PHO2-R   | GGAACCCAAGATGTGATTGGA       |
| 49 | AGL16-F  | AGAGGTCGAGGGTGTGAAA         |
| 50 | AGL16-R  | GGACATGTTCGTTTCGAGGTATC     |
| 51 | CIP4.1-F | GTGAGTTGACATCTACTCCAGTTAC   |
| 52 | CIP4.1-R | GTGCTCCGTTTATCTCGTTCA       |
| 53 | R3H-F    | TTCAACAGCCCTAGCAGTTC        |
| 54 | R3H-R    | CCACCACTTCAGTCTCATTCT       |

**Supplementary Table S3. The candidate validated targets of known miRNAs during *Arabidopsis* seed germination.**

| Serial no. | miRNA   | Target gene no.(Locus ID) | Description of the target gene          | Target annotation | Validated by |
|------------|---------|---------------------------|-----------------------------------------|-------------------|--------------|
| 1          | 165/166 | AT2G34710                 | Homeobox-leucine zipper protein PHB     | PHB               | qRT-PCR      |
| 2          |         | AT1G30490                 | Homeobox-leucine zipper protein PHV     | PHV               | qRT-PCR      |
| 3          |         | AT4G32880                 | Homeobox-leucine zipper protein ATHB-8  | ATHB8             | qRT-PCR      |
| 4          |         | AT1G52150                 | Homeobox-leucine zipper protein ATHB-15 | ATHB15            | qRT-PCR      |
| 5          | 172     | AT4G36920                 | APETALA2                                | AP2               | qRT-PCR      |
| 6          |         | AT2G28550                 | Target of early activation              | TOE1              | qRT-PCR      |

|   |     |           |                                         |      |         |
|---|-----|-----------|-----------------------------------------|------|---------|
|   |     |           | tagged(EAT)1                            |      |         |
| 7 |     | AT5G60120 | Target of early activation tagged(EAT)2 | TOE2 | qRT-PCR |
| 8 |     | AT5G67180 | Target of early activation tagged(EAT)3 | TOE3 | qRT-PCR |
| 9 | 390 | AT5G62000 | Auxin response factor 2                 | ARF2 | qRT-PCR |

|    |         |           |                                                                               |                           |         |
|----|---------|-----------|-------------------------------------------------------------------------------|---------------------------|---------|
| 10 |         | AT2G33860 | Auxin response factor 3                                                       | ARF3                      | qRT-PCR |
| 11 |         | AT5G60450 | Auxin response factor 4                                                       | ARF4                      | qRT-PCR |
| 12 | 160     | AT2G28350 | Auxin response factor 10                                                      | ARF10                     | qRT-PCR |
|    |         | AT4G30080 | Auxin response factor 16                                                      | ARF16                     | qRT-PCR |
| 13 |         | AT1G77850 | Auxin response factor 17                                                      | ARF17                     | qRT-PCR |
| 14 | 156/157 | AT2G33810 | Squamosa promoter binding protein-like 3                                      | SPL3                      | qRT-PCR |
| 15 | 156/157 | AT2G42200 | Squamosa promoter binding protein-like 9                                      | SPL9                      | qRT-PCR |
| 16 |         | AT1G27370 | Squamosa promoter binding protein-like 10                                     | SPL10                     | qRT-PCR |
| 17 | 164     | AT3G15170 | Cup-shaped cotyledon1(ANAC054, Arabidopsis NAC domain containing protein 54). | CUC1                      | qRT-PCR |
| 18 |         | AT5G53950 | Cup-shaped cotyledon2(ANAC098, Arabidopsis NAC domain containing protein 98). | CUC2                      | qRT-PCR |
| 19 |         | AT1G56010 | NAC domain proteins(ANAC022, Arabidopsis NAC domain containing protein 22).   | NAC1                      | qRT-PCR |
| 20 | 169     | AT1G17590 | Nuclear factor Y, subunit A8                                                  | NF-YA8                    | qRT-PCR |
| 21 |         | AT1G54160 | Nuclear factor Y, subunit A5                                                  | NF-YA5                    | qRT-PCR |
| 22 | 161     | AT5G16640 | Pentatricopeptide repeat (PPR) superfamily protein                            | (PPR) superfamily protein | qRT-PCR |
| 23 | 399     | AT2G33770 | Phosphate 2                                                                   | PHO2                      | qRT-PCR |
| 24 | 824     | AT3G57230 | AGAMOUS-like 16                                                               | AGL16                     | qRT-PCR |
| 25 | 834     | AT4G00930 | COP1-interacting protein 4.1                                                  | CIP4.1                    | qRT-PCR |
| 26 | 854     | AT5G05100 | Single-stranded nucleic acid binding R3H protein                              | R3H                       | qRT-PCR |
